# Supplementary material for: Performance of Multiplex Commercial Kits to Quantify Cytokine and Chemokine Responses in Culture Supernatants from Plasmodium falciparum Stimulations
Source: PLOS journal article supplement (doi:10.1371/journal.pone.0052587), 2013-01-02

Figure S7

A

|   | parameter                            | value        |
|---|--------------------------------------|--------------|
| 1 | Cytokine                             | IFN-gamma    |
| 2 | Vendor                               | Bender       |
| 3 | Samples included in this agreement   | 7            |
| 4 | Proportion of both readings in range | 18.9         |
| 5 | Limits of agreement                  | 0.64 to 1.66 |
| 6 | Constant variance p.value            | 0.281        |
| 7 | Constant ratio p.value               | 0.066        |
| 8 | Ratio is 1 p.value                   | 0.766        |

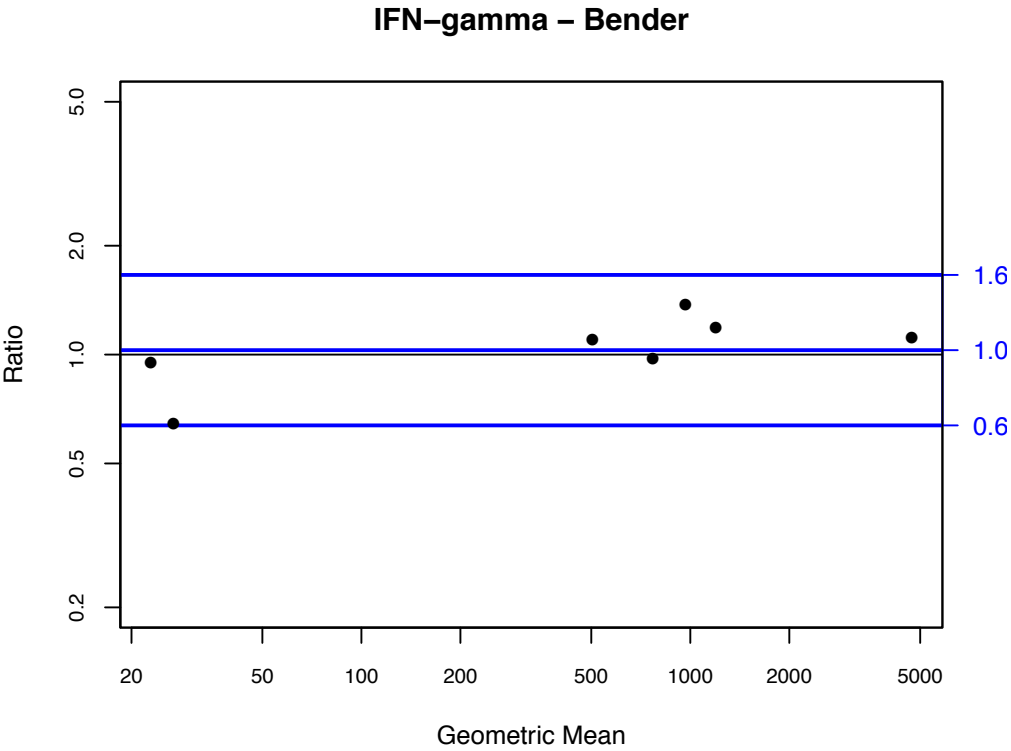

**B**

|   | parameter                            | value        |
|---|--------------------------------------|--------------|
| 1 | Cytokine                             | IFN-gamma    |
| 2 | Vendor                               | Bio-Rad      |
| 3 | Samples included in this agreement   | 26           |
| 4 | Proportion of both readings in range | 70.3         |
| 5 | Limits of agreement                  | 0.62 to 1.71 |
| 6 | Constant variance p.value            | 0.256        |
| 7 | Constant ratio p.value               | 0.263        |
| 8 | Ratio is 1 p.value                   | 0.583        |

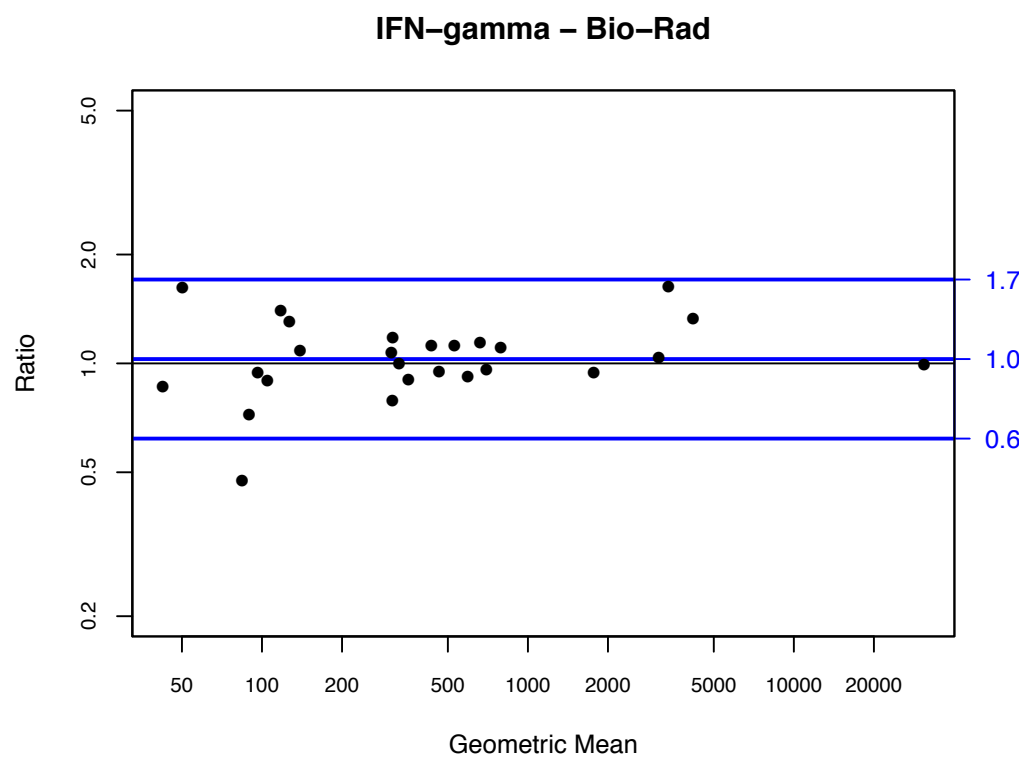

C

|   | parameter                            | value        |
|---|--------------------------------------|--------------|
| 1 | Cytokine                             | IFN-gamma    |
| 2 | Vendor                               | Invitrogen   |
| 3 | Samples included in this agreement   | 4            |
| 4 | Proportion of both readings in range | 10.8         |
| 5 | Limits of agreement                  | 0.25 to 5.05 |
| 6 | Constant variance p.value            | 0.899        |
| 7 | Constant ratio p.value               | 0.436        |
| 8 | Ratio is 1 p.value                   | 0.763        |

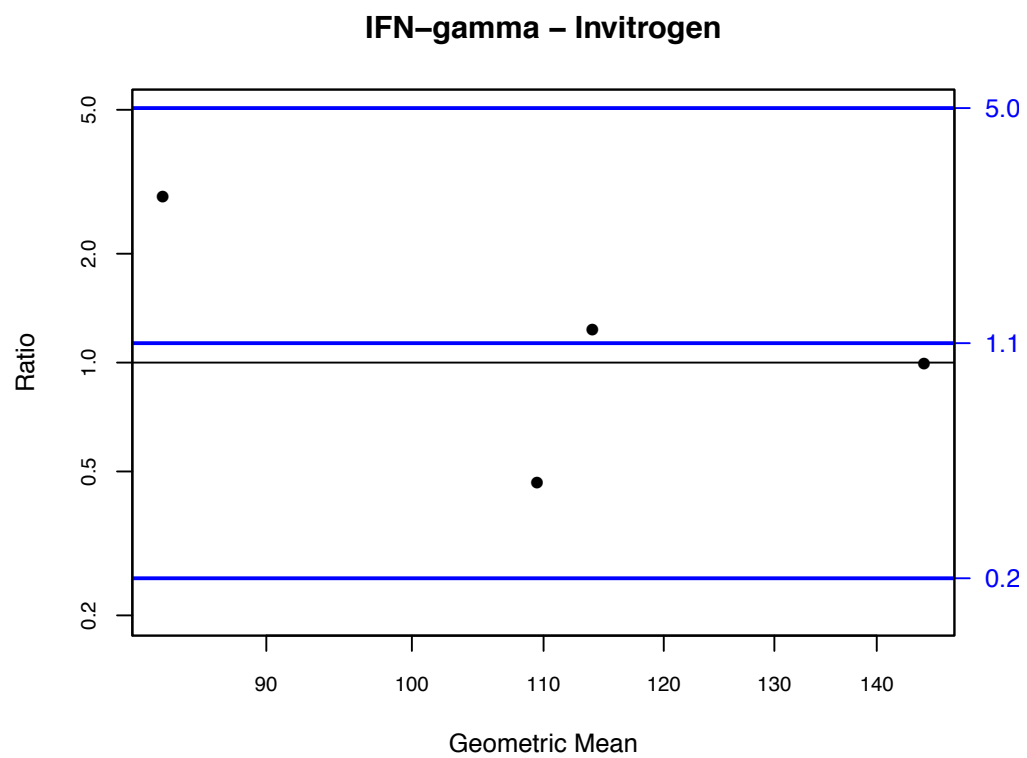

D

|   | parameter                            | value        |
|---|--------------------------------------|--------------|
| 1 | Cytokine                             | IFN-gamma    |
| 2 | Vendor                               | INV_MAG      |
| 3 | Samples included in this agreement   | 2            |
| 4 | Proportion of both readings in range | 5.0          |
| 5 | Limits of agreement                  | 0.98 to 0.99 |
| 6 | Constant variance p.value            | NaN          |
| 7 | Constant ratio p.value               | NaN          |
| 8 | Ratio is 1 p.value                   | 0.059        |

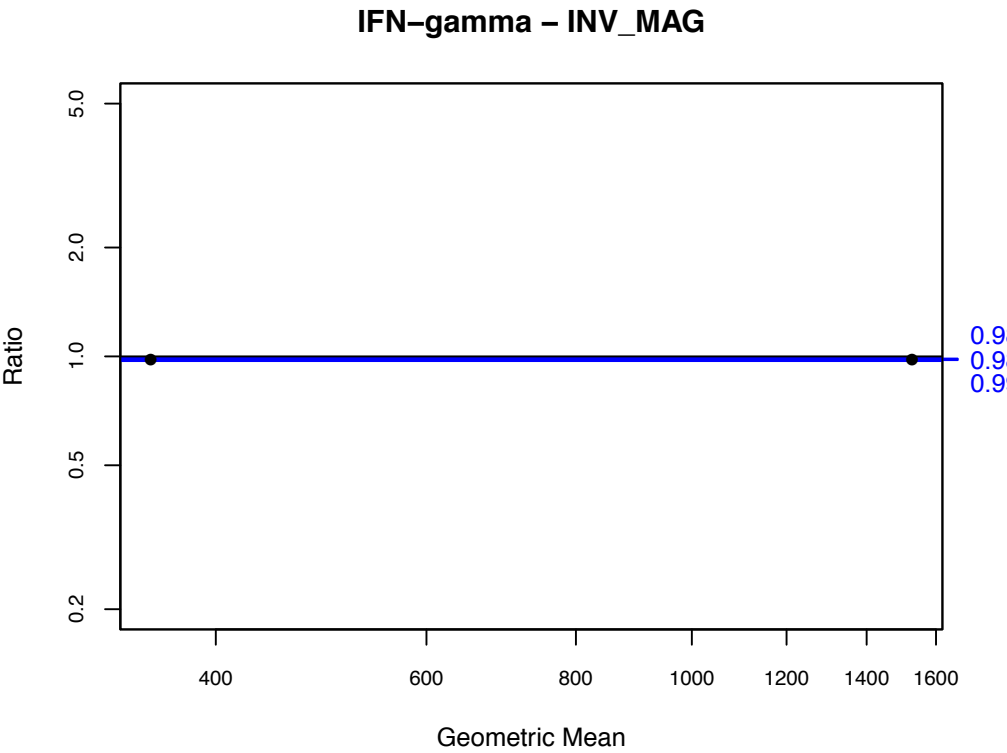

E

|   | parameter                            | value        |
|---|--------------------------------------|--------------|
| 1 | Cytokine                             | IFN-gamma    |
| 2 | Vendor                               | Millipore    |
| 3 | Samples included in this agreement   | 9            |
| 4 | Proportion of both readings in range | 24.3         |
| 5 | Limits of agreement                  | 0.73 to 1.28 |
| 6 | Constant variance p.value            | 0.141        |
| 7 | Constant ratio p.value               | 0.829        |
| 8 | Ratio is 1 p.value                   | 0.526        |

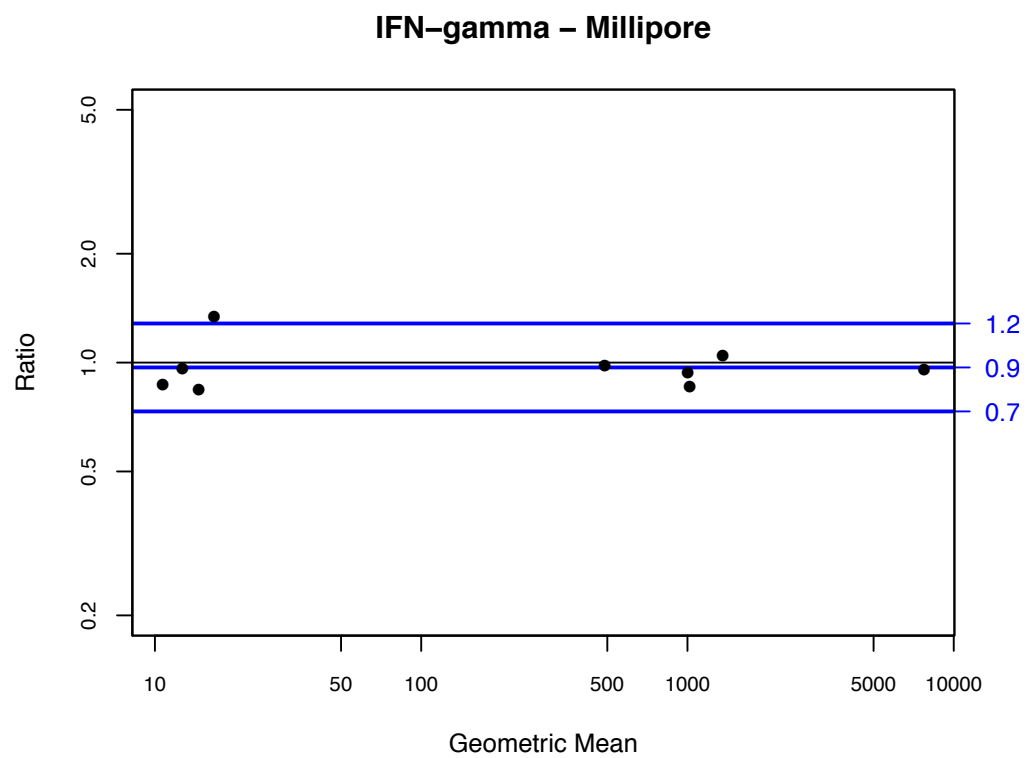

Supplement: S7 (10.1371/journal.pone.0052587.s007) [file journal.pone.0052587.s007]
