# Supplementary material for: Performance of Multiplex Commercial Kits to Quantify Cytokine and Chemokine Responses in Culture Supernatants from Plasmodium falciparum Stimulations
Source: PLOS journal article supplement (doi:10.1371/journal.pone.0052587), 2013-01-02

Figure S19  
A

|   | parameter                            | value        |
|---|--------------------------------------|--------------|
| 1 | Cytokine                             | IL-6         |
| 2 | Vendor                               | Bender       |
| 3 | Samples included in this agreement   | 29           |
| 4 | Proportion of both readings in range | 78.4         |
| 5 | Limits of agreement                  | 0.68 to 1.52 |
| 6 | Constant variance p.value            | 0.590        |
| 7 | Constant ratio p.value               | 0.629        |
| 8 | Ratio is 1 p.value                   | 0.676        |

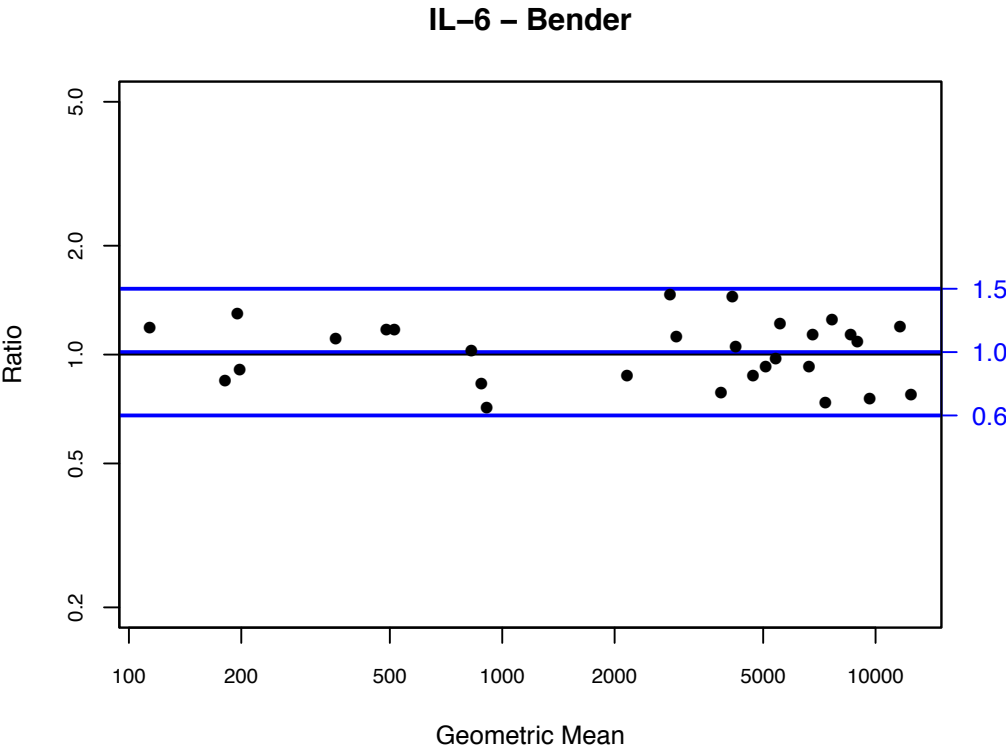

**B**

|   | parameter                            | value        |
|---|--------------------------------------|--------------|
| 1 | Cytokine                             | IL-6         |
| 2 | Vendor                               | Bio-Rad      |
| 3 | Samples included in this agreement   | 21           |
| 4 | Proportion of both readings in range | 56.8         |
| 5 | Limits of agreement                  | 0.72 to 1.40 |
| 6 | Constant variance p.value            | 0.707        |
| 7 | Constant ratio p.value               | 0.072        |
| 8 | Ratio is 1 p.value                   | 0.980        |

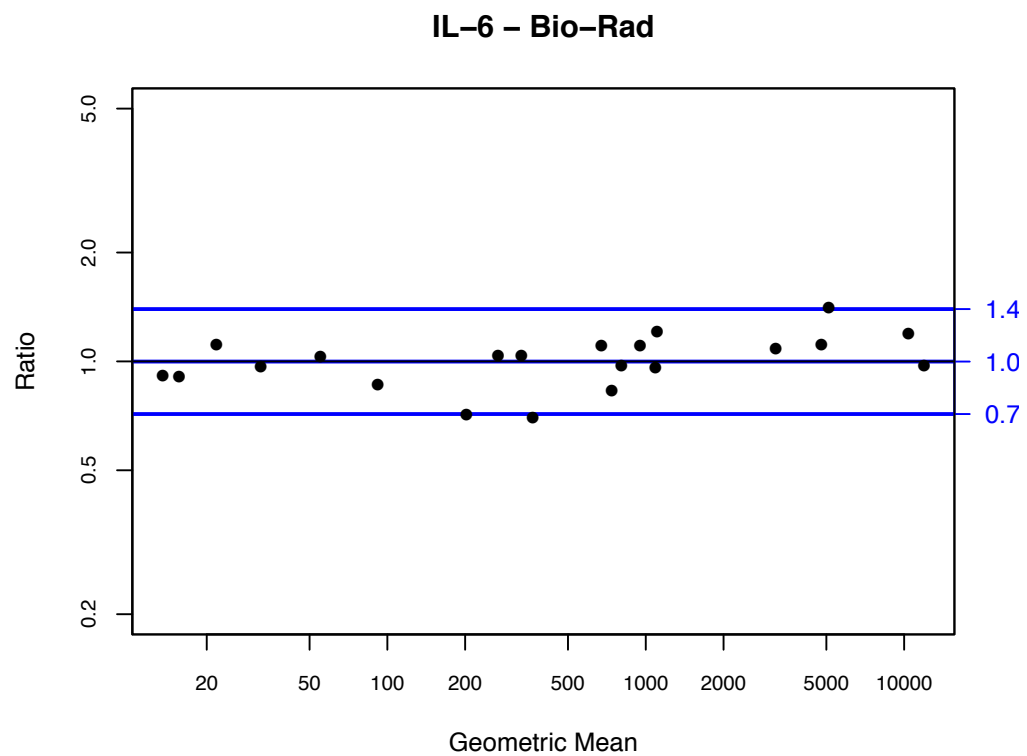

C

|   | parameter                            | value        |
|---|--------------------------------------|--------------|
| 1 | Cytokine                             | IL-6         |
| 2 | Vendor                               | Invitrogen   |
| 3 | Samples included in this agreement   | 21           |
| 4 | Proportion of both readings in range | 56.8         |
| 5 | Limits of agreement                  | 0.51 to 2.43 |
| 6 | Constant variance p.value            | 0.957        |
| 7 | Constant ratio p.value               | 0.365        |
| 8 | Ratio is 1 p.value                   | 0.216        |

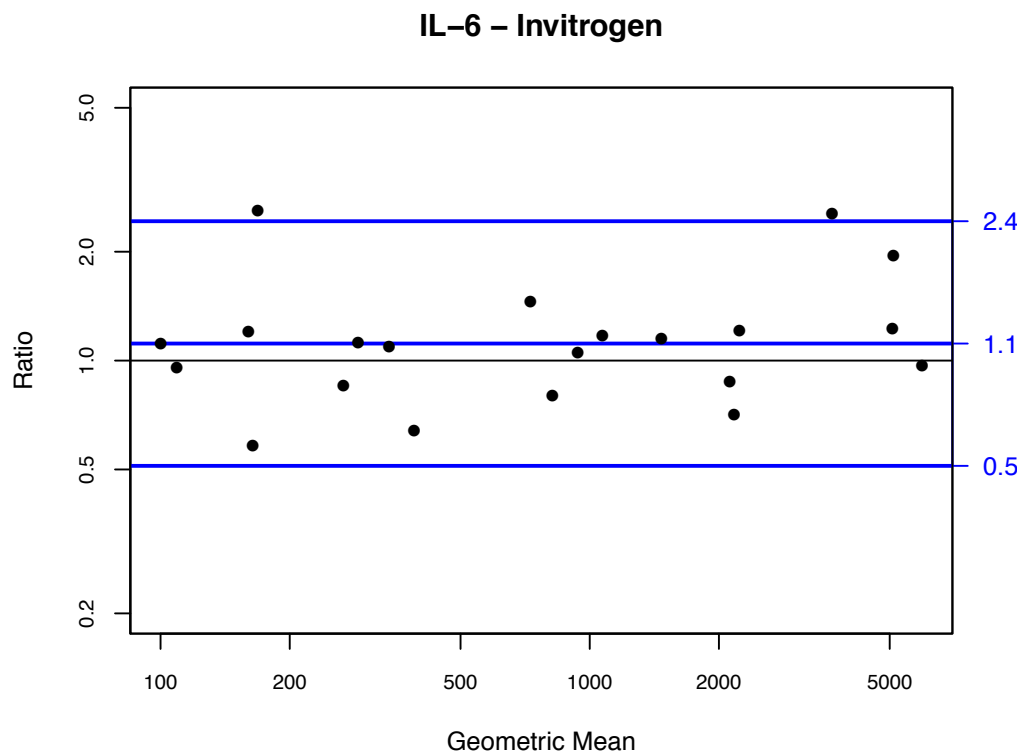

D

|   | parameter                            | value        |
|---|--------------------------------------|--------------|
| 1 | Cytokine                             | IL-6         |
| 2 | Vendor                               | INV_MAG      |
| 3 | Samples included in this agreement   | 30           |
| 4 | Proportion of both readings in range | 75.0         |
| 5 | Limits of agreement                  | 0.89 to 1.18 |
| 6 | Constant variance p.value            | 0.007        |
| 7 | Constant ratio p.value               | 0.015        |
| 8 | Ratio is 1 p.value                   | 0.094        |

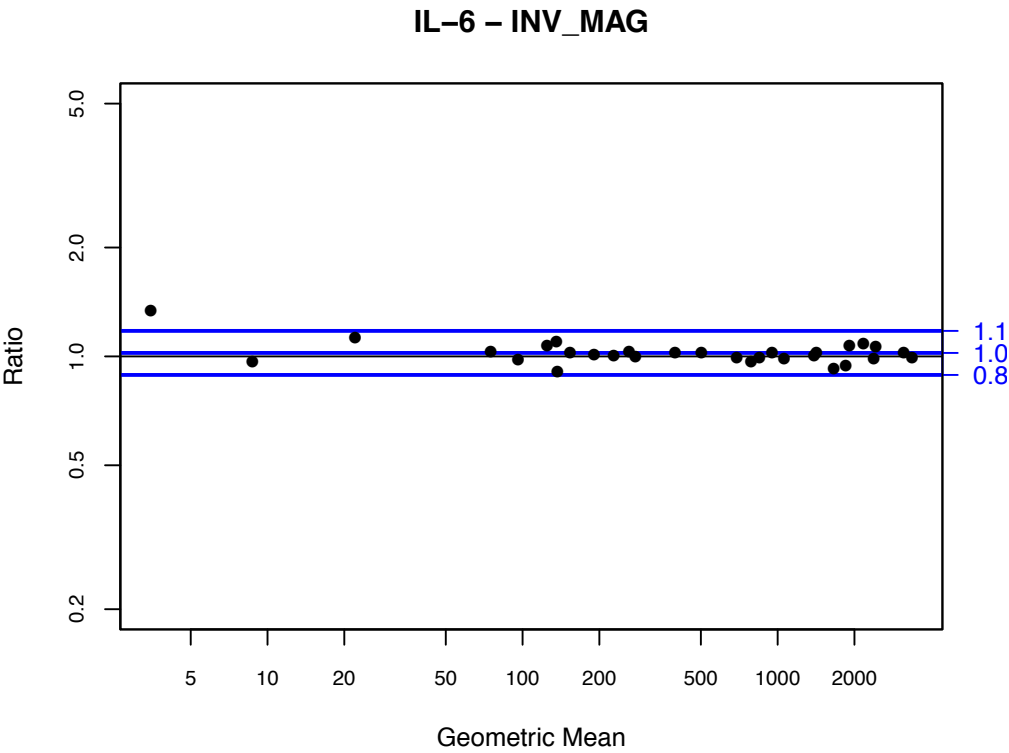

E

|   | parameter                            | value        |
|---|--------------------------------------|--------------|
| 1 | Cytokine                             | IL-6         |
| 2 | Vendor                               | Millipore    |
| 3 | Samples included in this agreement   | 25           |
| 4 | Proportion of both readings in range | 67.6         |
| 5 | Limits of agreement                  | 0.77 to 1.25 |
| 6 | Constant variance p.value            | 0.004        |
| 7 | Constant ratio p.value               | 0.073        |
| 8 | Ratio is 1 p.value                   | 0.411        |

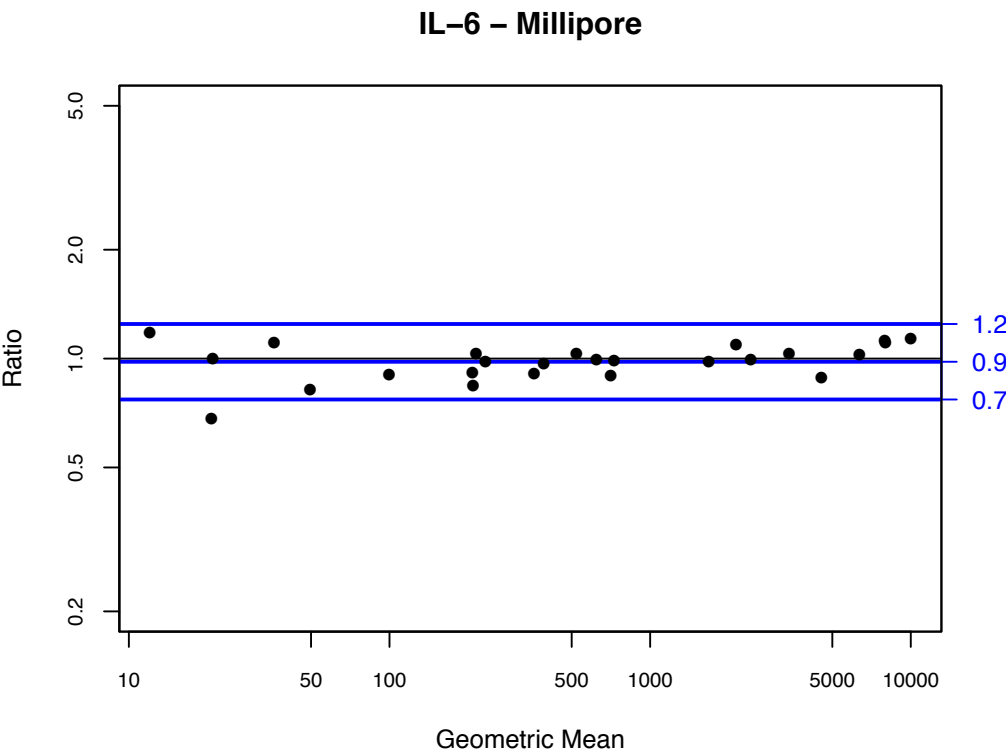

Supplement: S19 (10.1371/journal.pone.0052587.s019) [file journal.pone.0052587.s019]
