# Supplementary material for: Performance of Multiplex Commercial Kits to Quantify Cytokine and Chemokine Responses in Culture Supernatants from Plasmodium falciparum Stimulations
Source: PLOS journal article supplement (doi:10.1371/journal.pone.0052587), 2013-01-02

Figure S21

A

|   | parameter                            | value        |
|---|--------------------------------------|--------------|
| 1 | Cytokine                             | IL-8         |
| 2 | Vendor                               | Bender       |
| 3 | Samples included in this agreement   | 30           |
| 4 | Proportion of both readings in range | 81.1         |
| 5 | Limits of agreement                  | 0.58 to 1.57 |
| 6 | Constant variance p.value            | 0.003        |
| 7 | Constant ratio p.value               | 0.126        |
| 8 | Ratio is 1 p.value                   | 0.310        |

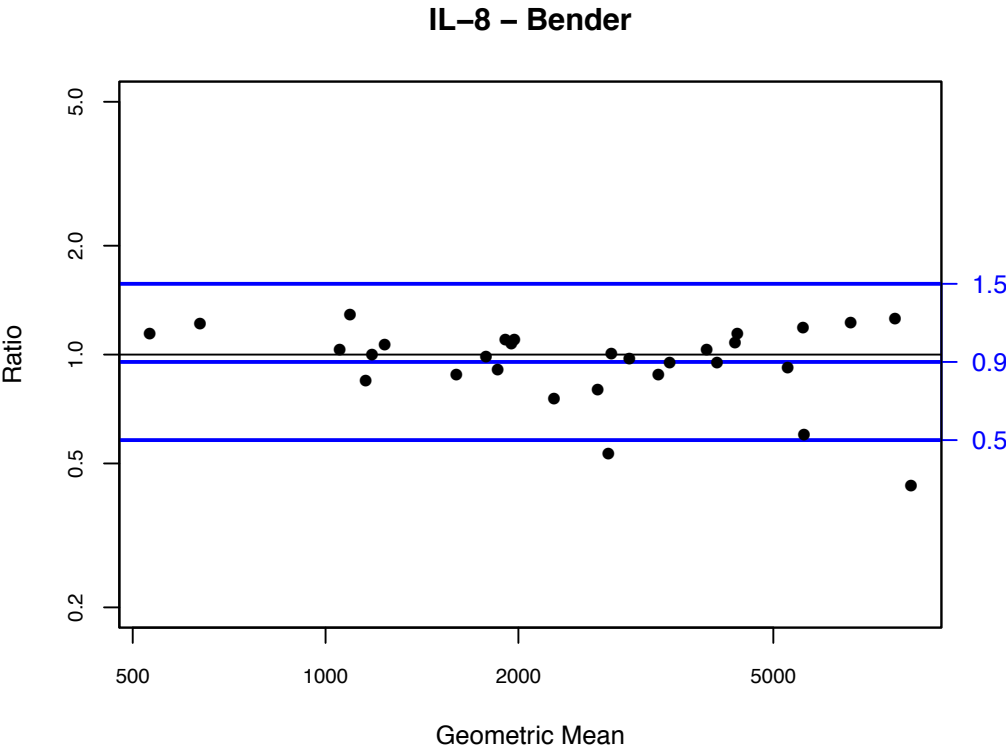

B

|   | parameter                            | value        |
|---|--------------------------------------|--------------|
| 1 | Cytokine                             | IL-8         |
| 2 | Vendor                               | Bio-Rad      |
| 3 | Samples included in this agreement   | 4            |
| 4 | Proportion of both readings in range | 10.8         |
| 5 | Limits of agreement                  | 0.79 to 1.15 |
| 6 | Constant variance p.value            | 0.534        |
| 7 | Constant ratio p.value               | 0.715        |
| 8 | Ratio is 1 p.value                   | 0.373        |

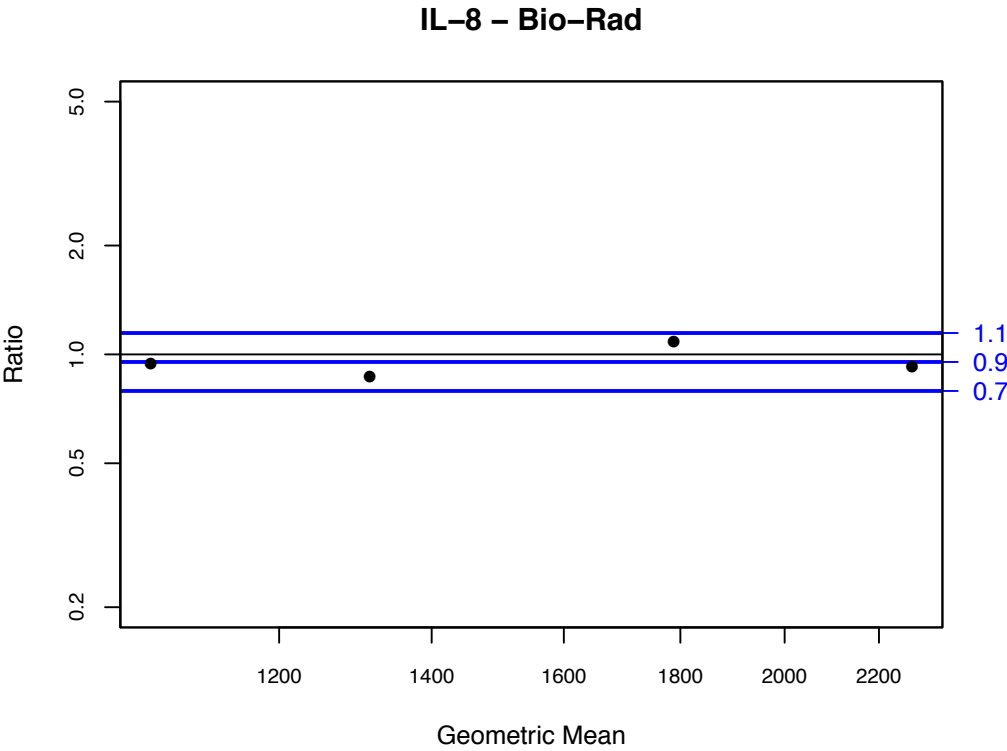

C

|   | parameter                            | value        |
|---|--------------------------------------|--------------|
| 1 | Cytokine                             | IL-8         |
| 2 | Vendor                               | Invitrogen   |
| 3 | Samples included in this agreement   | 15           |
| 4 | Proportion of both readings in range | 40.5         |
| 5 | Limits of agreement                  | 0.47 to 2.40 |
| 6 | Constant variance p.value            | 0.752        |
| 7 | Constant ratio p.value               | 0.008        |
| 8 | Ratio is 1 p.value                   | 0.556        |

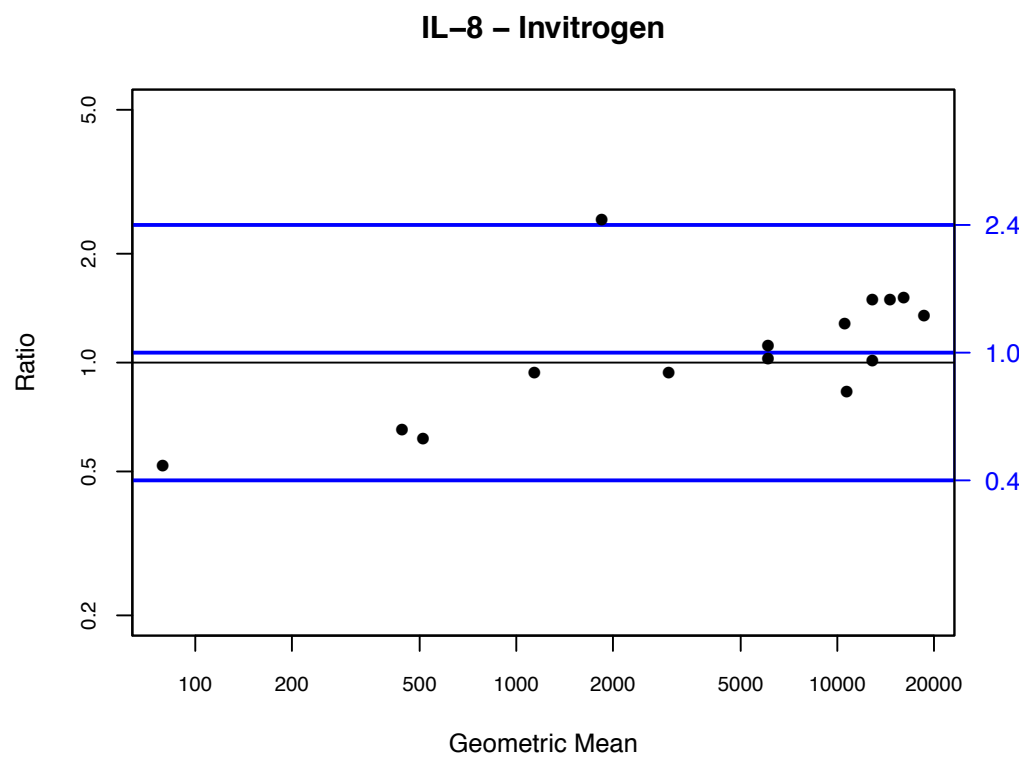

D

|   | parameter                            | value        |
|---|--------------------------------------|--------------|
| 1 | Cytokine                             | IL-8         |
| 2 | Vendor                               | INV_MAG      |
| 3 | Samples included in this agreement   | 9            |
| 4 | Proportion of both readings in range | 22.5         |
| 5 | Limits of agreement                  | 0.93 to 1.17 |
| 6 | Constant variance p.value            | 0.055        |
| 7 | Constant ratio p.value               | 0.112        |
| 8 | Ratio is 1 p.value                   | 0.051        |

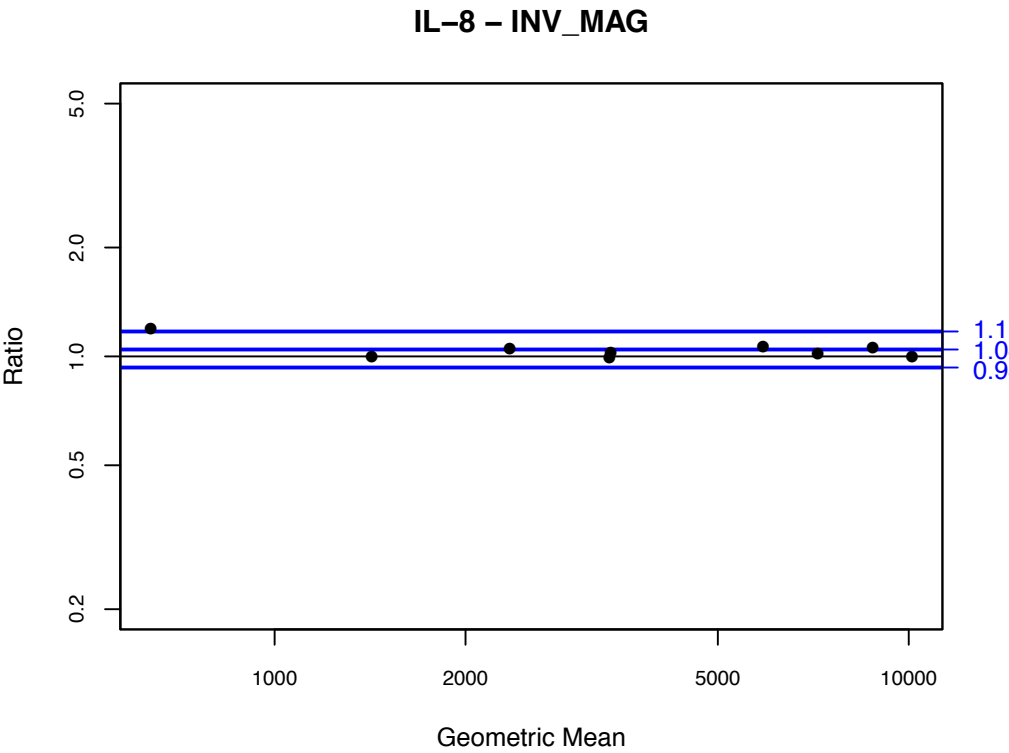

E

|   | parameter                            | value        |
|---|--------------------------------------|--------------|
| 1 | Cytokine                             | IL-8         |
| 2 | Vendor                               | Millipore    |
| 3 | Samples included in this agreement   | 13           |
| 4 | Proportion of both readings in range | 35.1         |
| 5 | Limits of agreement                  | 0.81 to 1.14 |
| 6 | Constant variance p.value            | 0.965        |
| 7 | Constant ratio p.value               | 0.924        |
| 8 | Ratio is 1 p.value                   | 0.119        |

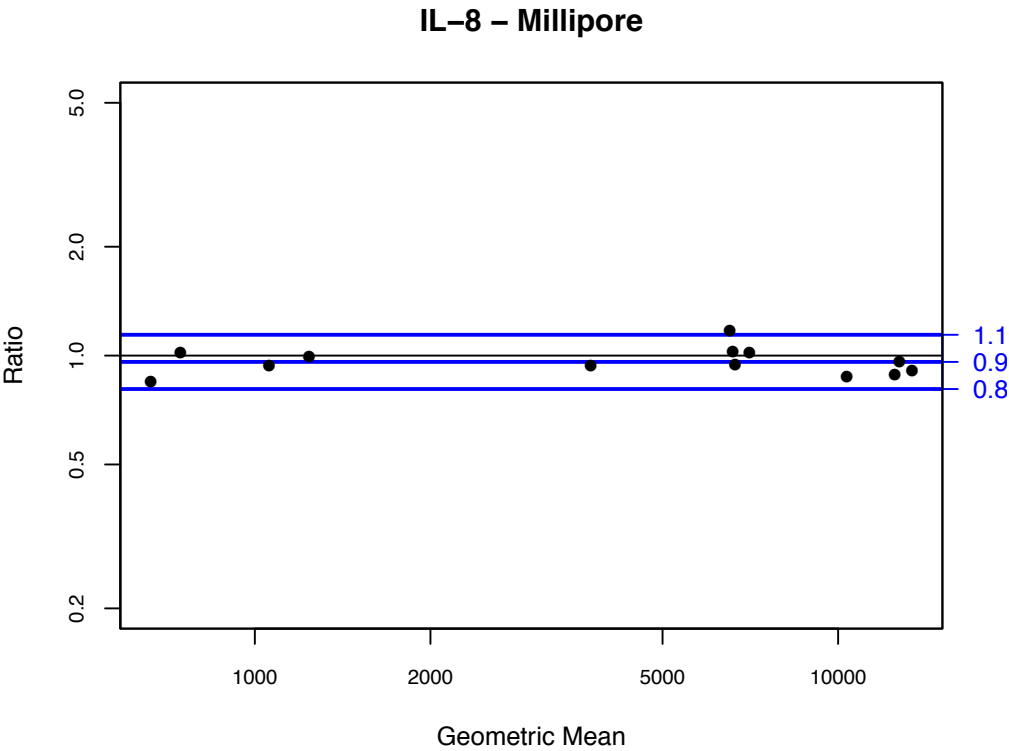

Supplement: S21 (10.1371/journal.pone.0052587.s021) [file journal.pone.0052587.s021]
