# Supplementary material for: Performance of Multiplex Commercial Kits to Quantify Cytokine and Chemokine Responses in Culture Supernatants from Plasmodium falciparum Stimulations
Source: PLOS journal article supplement (doi:10.1371/journal.pone.0052587), 2013-01-02

Figure S28

A

|   | parameter                            | value        |
|---|--------------------------------------|--------------|
| 1 | Cytokine                             | TNF-alpha    |
| 2 | Vendor                               | Bender       |
| 3 | Samples included in this agreement   | 16           |
| 4 | Proportion of both readings in range | 43.2         |
| 5 | Limits of agreement                  | 0.62 to 1.97 |
| 6 | Constant variance p.value            | 0.807        |
| 7 | Constant ratio p.value               | 0.026        |
| 8 | Ratio is 1 p.value                   | 0.188        |

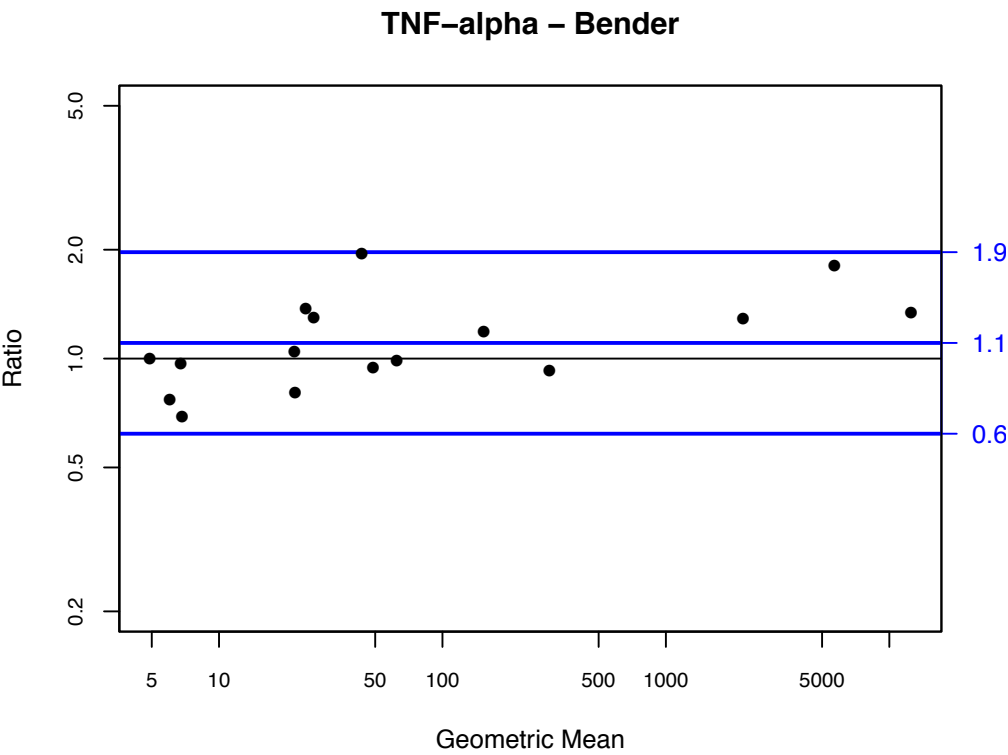

**B**

|   | parameter                            | value        |
|---|--------------------------------------|--------------|
| 1 | Cytokine                             | TNF -alpha   |
| 2 | Vendor                               | Bio-Rad      |
| 3 | Samples included in this agreement   | 20           |
| 4 | Proportion of both readings in range | 54.1         |
| 5 | Limits of agreement                  | 0.77 to 1.56 |
| 6 | Constant variance p.value            | 0.797        |
| 7 | Constant ratio p.value               | 0.974        |
| 8 | Ratio is 1 p.value                   | 0.037        |

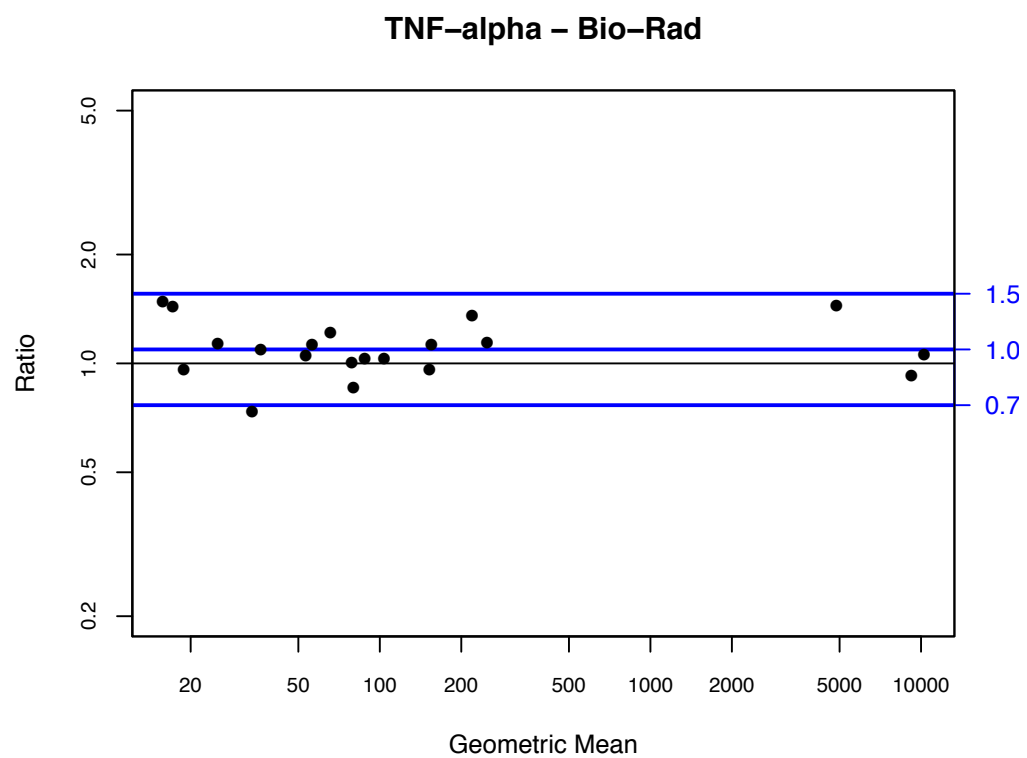

C

|   | parameter                            | value        |
|---|--------------------------------------|--------------|
| 1 | Cytokine                             | TNF-alpha    |
| 2 | Vendor                               | Invitrogen   |
| 3 | Samples included in this agreement   | 5            |
| 4 | Proportion of both readings in range | 13.5         |
| 5 | Limits of agreement                  | 0.31 to 7.56 |
| 6 | Constant variance p.value            | 0.154        |
| 7 | Constant ratio p.value               | 0.065        |
| 8 | Ratio is 1 p.value                   | 0.290        |

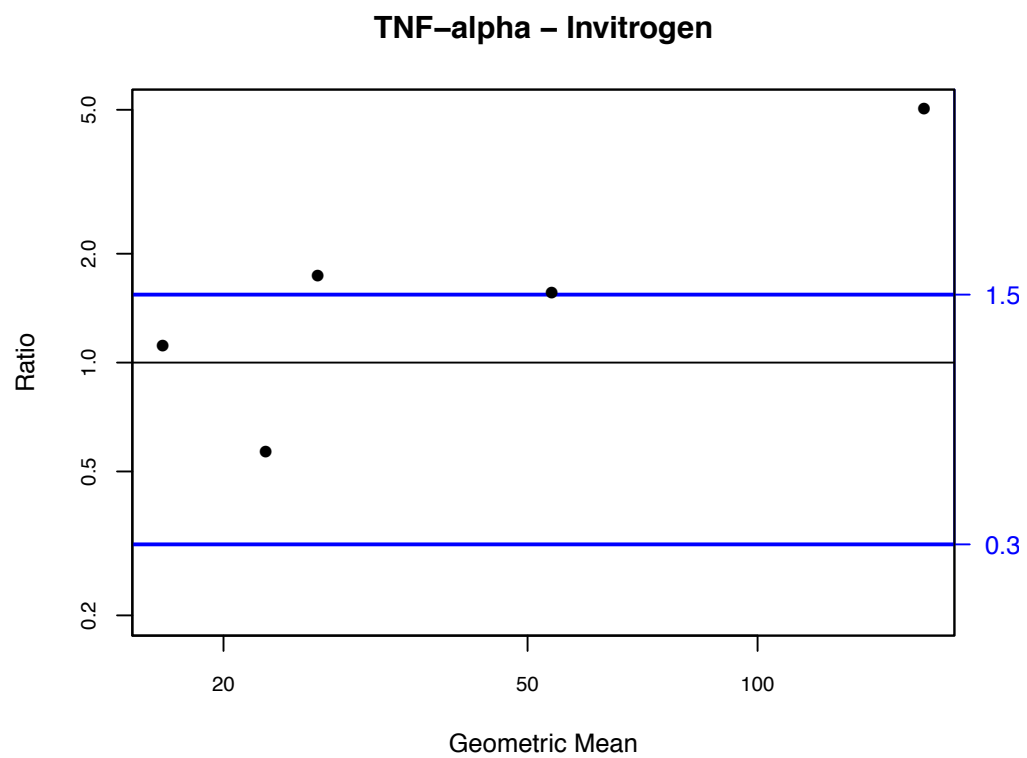

D

|   | parameter                            | value        |
|---|--------------------------------------|--------------|
| 1 | Cytokine                             | TNF -alpha   |
| 2 | Vendor                               | INV_MAG      |
| 3 | Samples included in this agreement   | 24           |
| 4 | Proportion of both readings in range | 60.0         |
| 5 | Limits of agreement                  | 0.58 to 1.45 |
| 6 | Constant variance p.value            | 0.064        |
| 7 | Constant ratio p.value               | 0.518        |
| 8 | Ratio is 1 p.value                   | 0.090        |

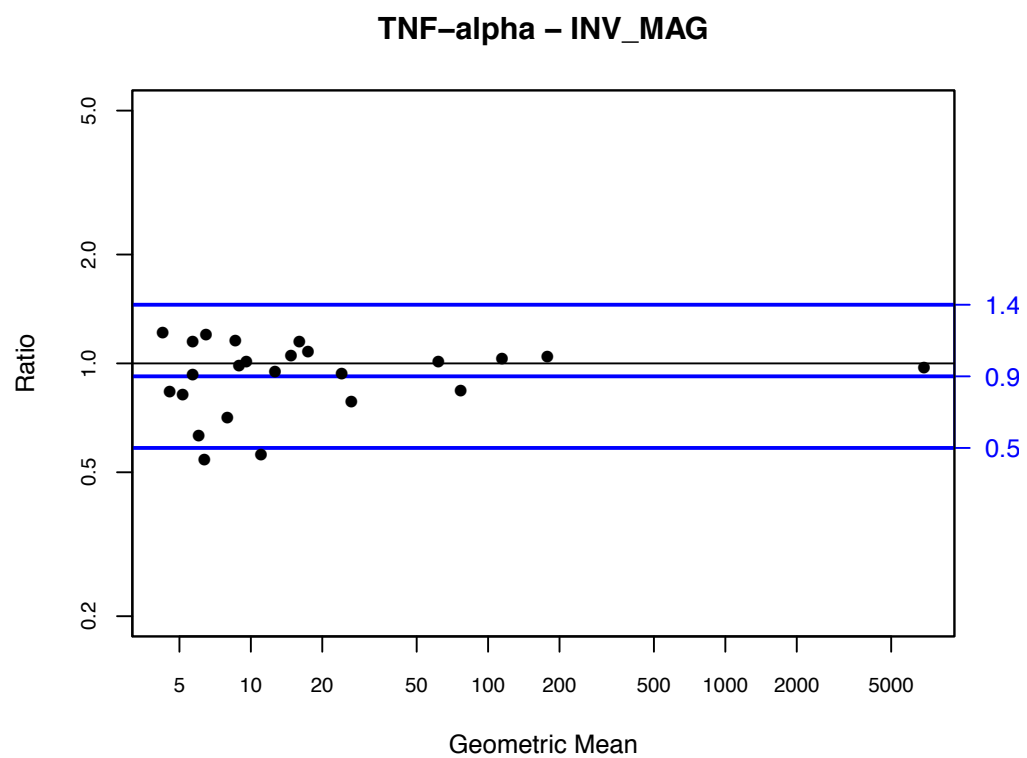

E

|   | parameter                            | value        |
|---|--------------------------------------|--------------|
| 1 | Cytokine                             | TNF-alpha    |
| 2 | Vendor                               | Millipore    |
| 3 | Samples included in this agreement   | 28           |
| 4 | Proportion of both readings in range | 75.7         |
| 5 | Limits of agreement                  | 0.82 to 1.22 |
| 6 | Constant variance p.value            | 0.595        |
| 7 | Constant ratio p.value               | 0.388        |
| 8 | Ratio is 1 p.value                   | 0.972        |

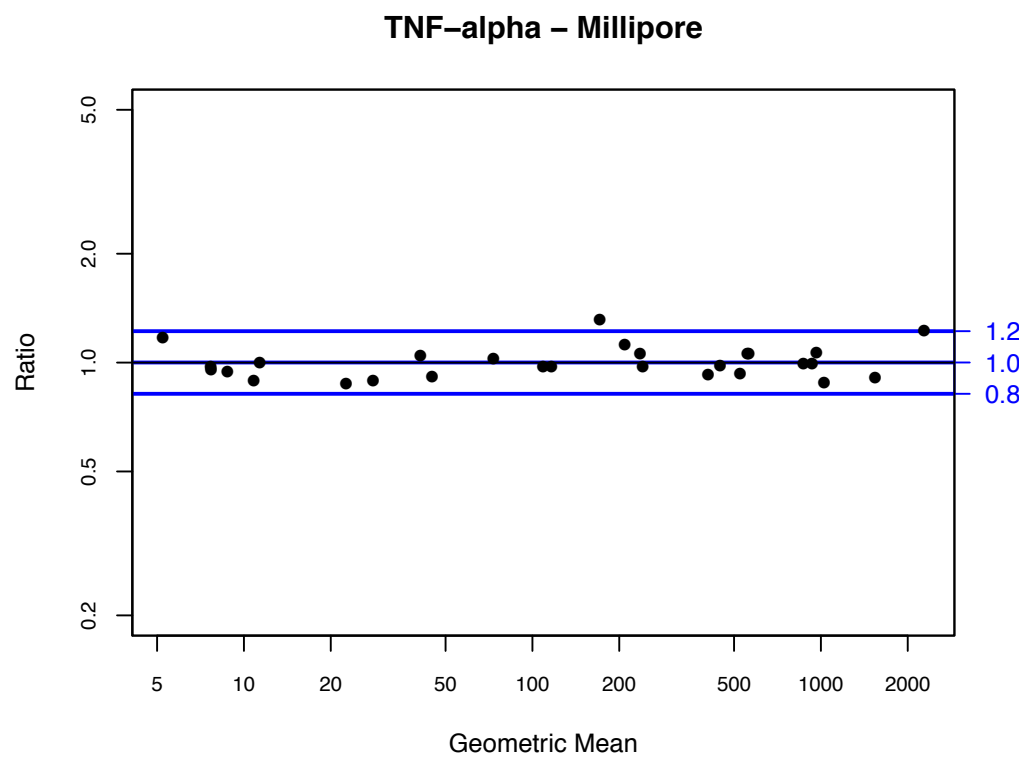

Supplement: S28 (10.1371/journal.pone.0052587.s028) [file journal.pone.0052587.s028]
