# Supplementary material for: Performance of Multiplex Commercial Kits to Quantify Cytokine and Chemokine Responses in Culture Supernatants from Plasmodium falciparum Stimulations
Source: PLOS journal article supplement (doi:10.1371/journal.pone.0052587), 2013-01-02

Figure S3

A

|   | parameter                            | value        |
|---|--------------------------------------|--------------|
| 1 | Cytokine                             | G-CSF        |
| 2 | Vendor                               | Bio-Rad      |
| 3 | Samples included in this agreement   | 32           |
| 4 | Proportion of both readings in range | 86.5         |
| 5 | Limits of agreement                  | 0.70 to 1.51 |
| 6 | Constant variance p.value            | 0.003        |
| 7 | Constant ratio p.value               | 0.249        |
| 8 | Ratio is 1 p.value                   | 0.454        |

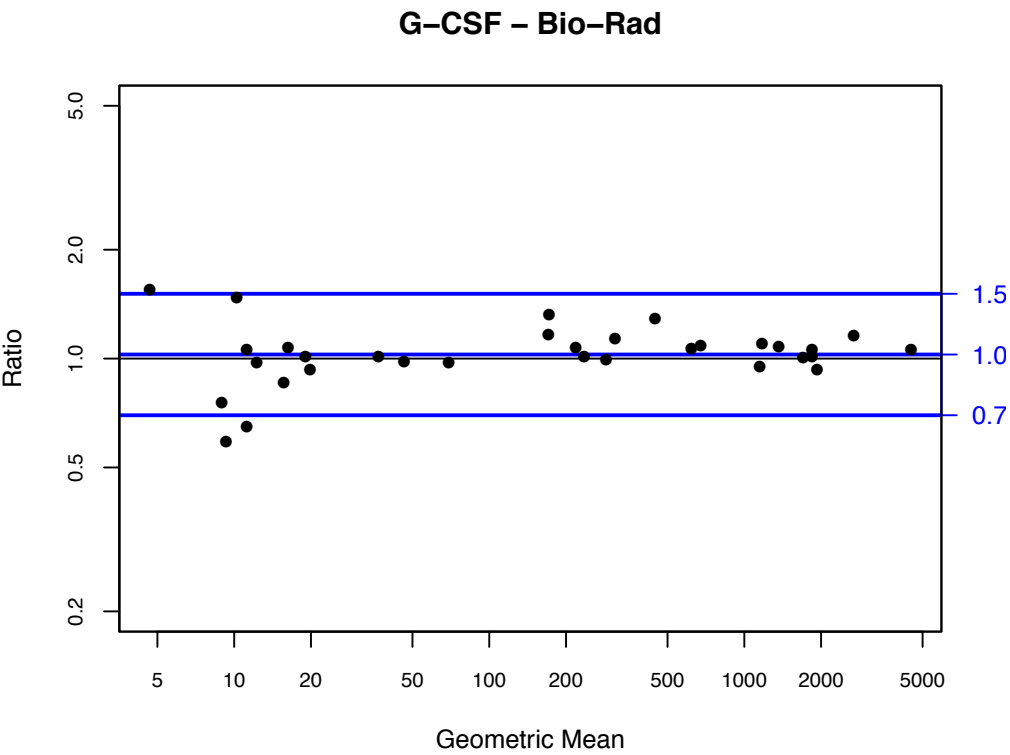

B

|   | parameter                            | value        |
|---|--------------------------------------|--------------|
| 1 | Cytokine                             | G-CSF        |
| 2 | Vendor                               | INV_MAG      |
| 3 | Samples included in this agreement   | 26           |
| 4 | Proportion of both readings in range | 65.0         |
| 5 | Limits of agreement                  | 0.56 to 1.47 |
| 6 | Constant variance p.value            | 0.096        |
| 7 | Constant ratio p.value               | 0.143        |
| 8 | Ratio is 1 p.value                   | 0.059        |

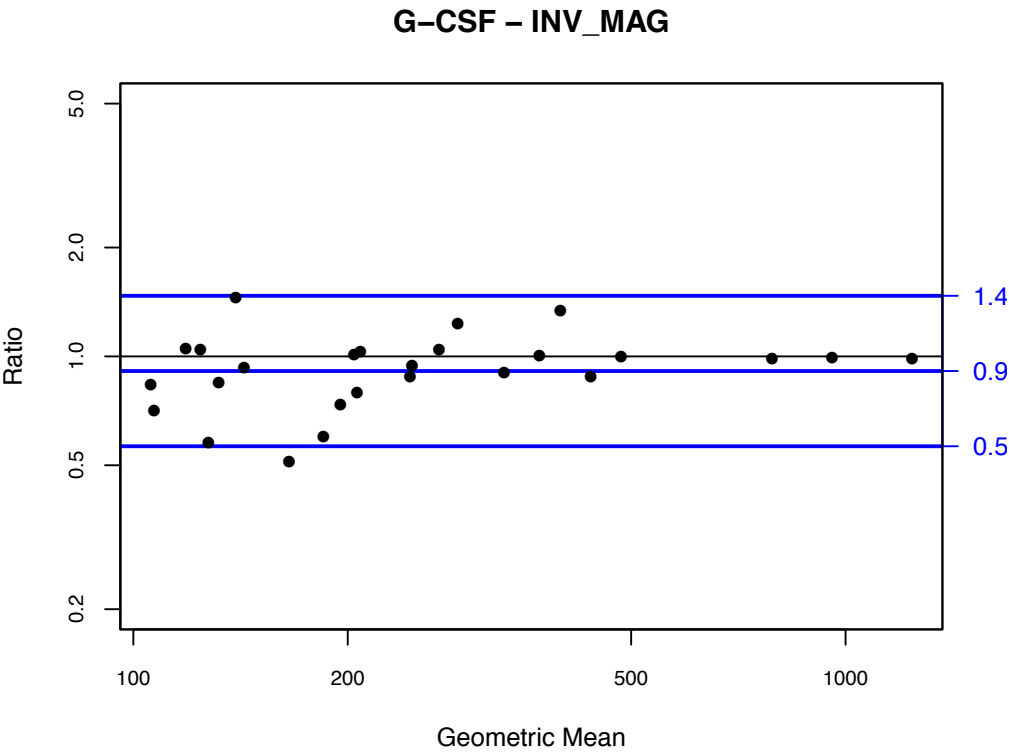

Supplement: S3 (10.1371/journal.pone.0052587.s003) [file journal.pone.0052587.s003]
