# Supplementary material for: Performance of Multiplex Commercial Kits to Quantify Cytokine and Chemokine Responses in Culture Supernatants from Plasmodium falciparum Stimulations
Source: PLOS journal article supplement (doi:10.1371/journal.pone.0052587), 2013-01-02

# Figure S12

A

| parameter                              | value        |
|----------------------------------------|--------------|
| 1 Cytokine                             | IL-17        |
| 2 Vendor                               | Bio-Rad      |
| 3 Samples included in this agreement   | 22           |
| 4 Proportion of both readings in range | 59.5         |
| 5 Limits of agreement                  | 0.74 to 1.54 |
| 6 Constant variance p.value            | 0.019        |
| 7 Constant ratio p.value               | 0.096        |
| 8 Ratio is 1 p.value                   | 0.094        |

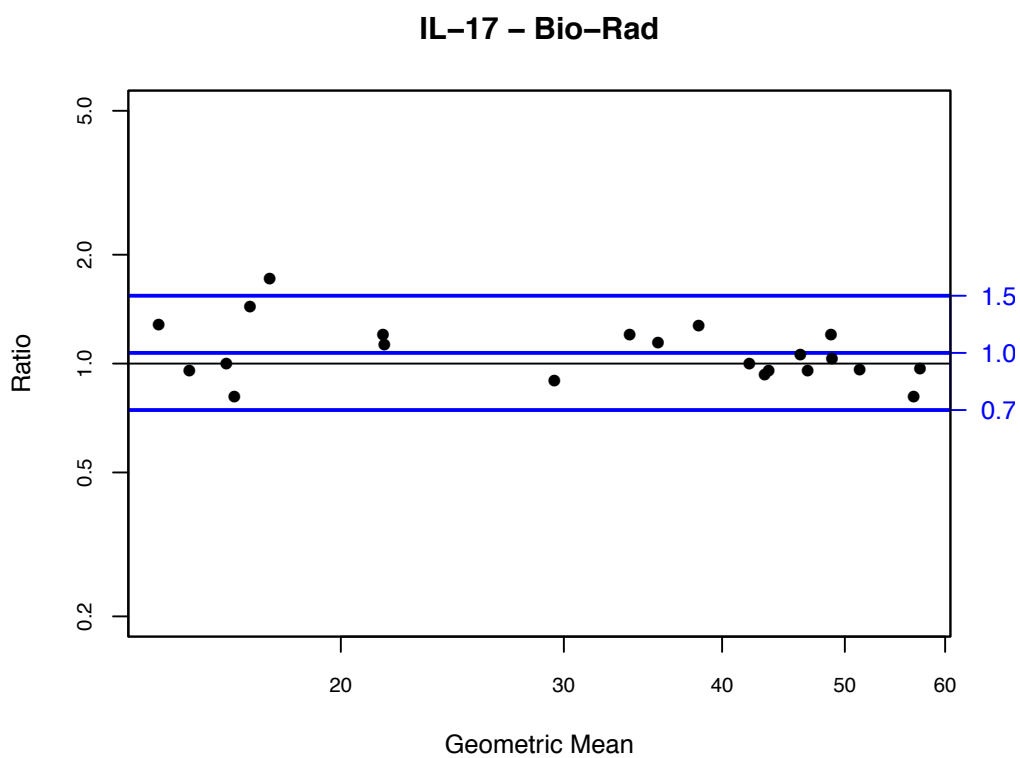

**B**

| parameter                              | value        |
|----------------------------------------|--------------|
| 1 Cytokine                             | IL-17        |
| 2 Vendor                               | INV_MAG      |
| 3 Samples included in this agreement   | 11           |
| 4 Proportion of both readings in range | 27.5         |
| 5 Limits of agreement                  | 0.31 to 2.06 |
| 6 Constant variance p.value            | 0.673        |
| 7 Constant ratio p.value               | 0.653        |
| 8 Ratio is 1 p.value                   | 0.150        |

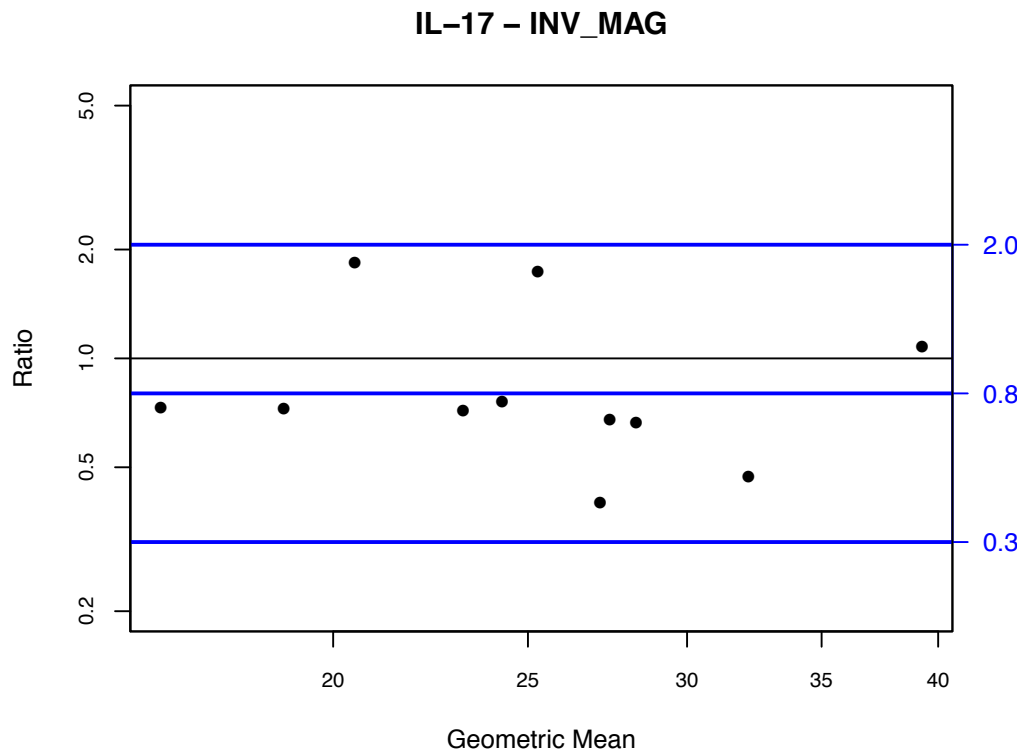

Supplement: S12 (10.1371/journal.pone.0052587.s012) [file journal.pone.0052587.s012]
