# Supplementary material for: Performance of Multiplex Commercial Kits to Quantify Cytokine and Chemokine Responses in Culture Supernatants from Plasmodium falciparum Stimulations
Source: PLOS journal article supplement (doi:10.1371/journal.pone.0052587), 2013-01-02

**Figure S16**

**A**

| parameter                              | value        |
|----------------------------------------|--------------|
| 1 Cytokine                             | IL -2R       |
| 2 Vendor                               | Invitrogen   |
| 3 Samples included in this agreement   | 14           |
| 4 Proportion of both readings in range | 37.8         |
| 5 Limits of agreement                  | 0.48 to 2.23 |
| 6 Constant variance p.value            | 0.587        |
| 7 Constant ratio p.value               | 0.048        |
| 8 Ratio is 1 p.value                   | 0.778        |

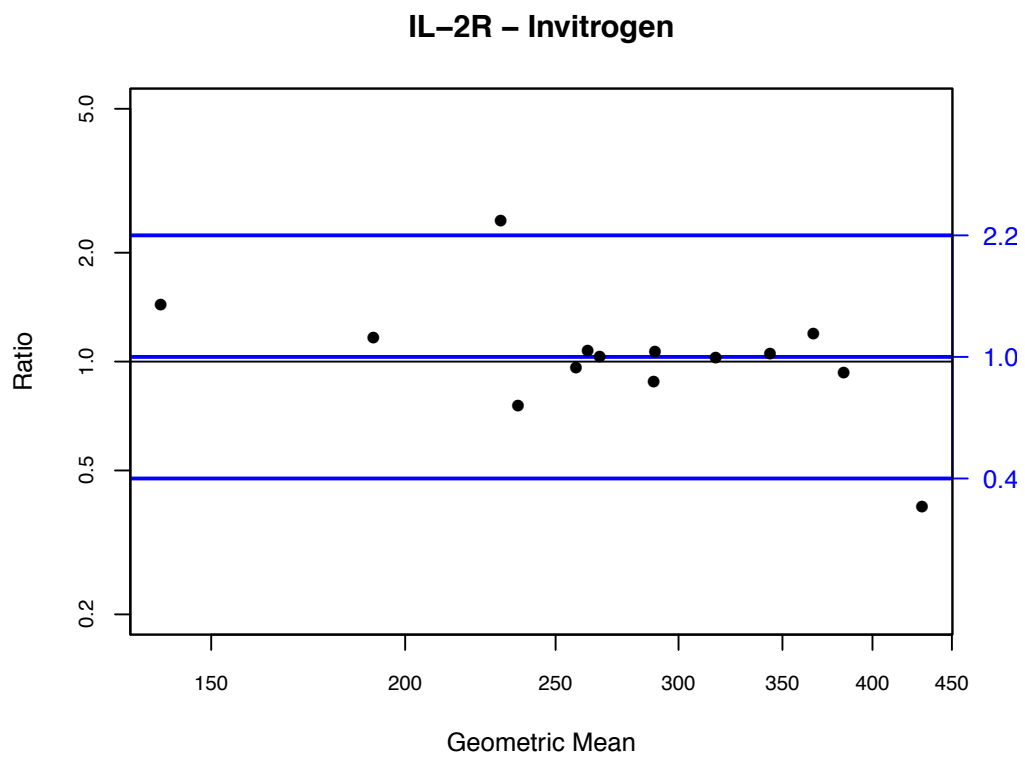

**B**

| parameter                              | value        |
|----------------------------------------|--------------|
| 1 Cytokine                             | IL-2R        |
| 2 Vendor                               | INV_MAG      |
| 3 Samples included in this agreement   | 30           |
| 4 Proportion of both readings in range | 75.0         |
| 5 Limits of agreement                  | 0.64 to 1.45 |
| 6 Constant variance p.value            | 0.662        |
| 7 Constant ratio p.value               | 0.238        |
| 8 Ratio is 1 p.value                   | 0.313        |

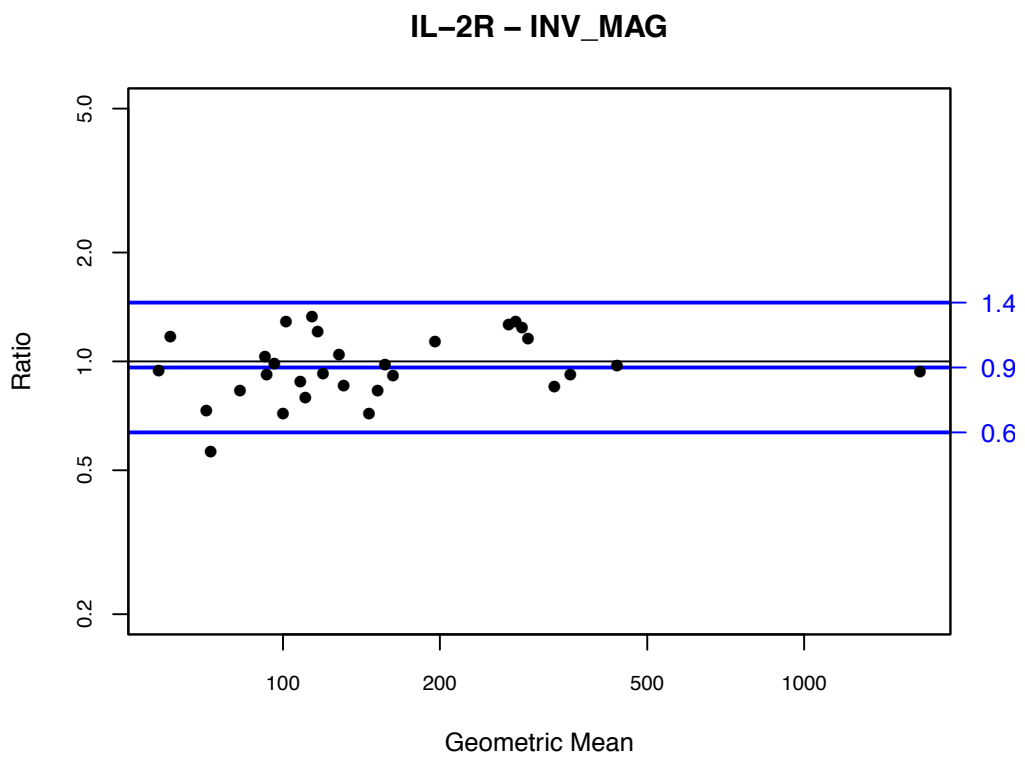

Supplement: S16 (10.1371/journal.pone.0052587.s016) [file journal.pone.0052587.s016]
