# Supplementary material for: Performance of Multiplex Commercial Kits to Quantify Cytokine and Chemokine Responses in Culture Supernatants from Plasmodium falciparum Stimulations
Source: PLOS journal article supplement (doi:10.1371/journal.pone.0052587), 2013-01-02

Figure S24

|   | parameter                            | value        |
|---|--------------------------------------|--------------|
| 1 | Cytokine                             | MIG          |
| 2 | Vendor                               | INV_MAG      |
| 3 | Samples included in this agreement   | 19           |
| 4 | Proportion of both readings in range | 47.5         |
| 5 | Limits of agreement                  | 0.58 to 1.59 |
| 6 | Constant variance p.value            | 0.026        |
| 7 | Constant ratio p.value               | 0.935        |
| 8 | Ratio is 1 p.value                   | 0.491        |

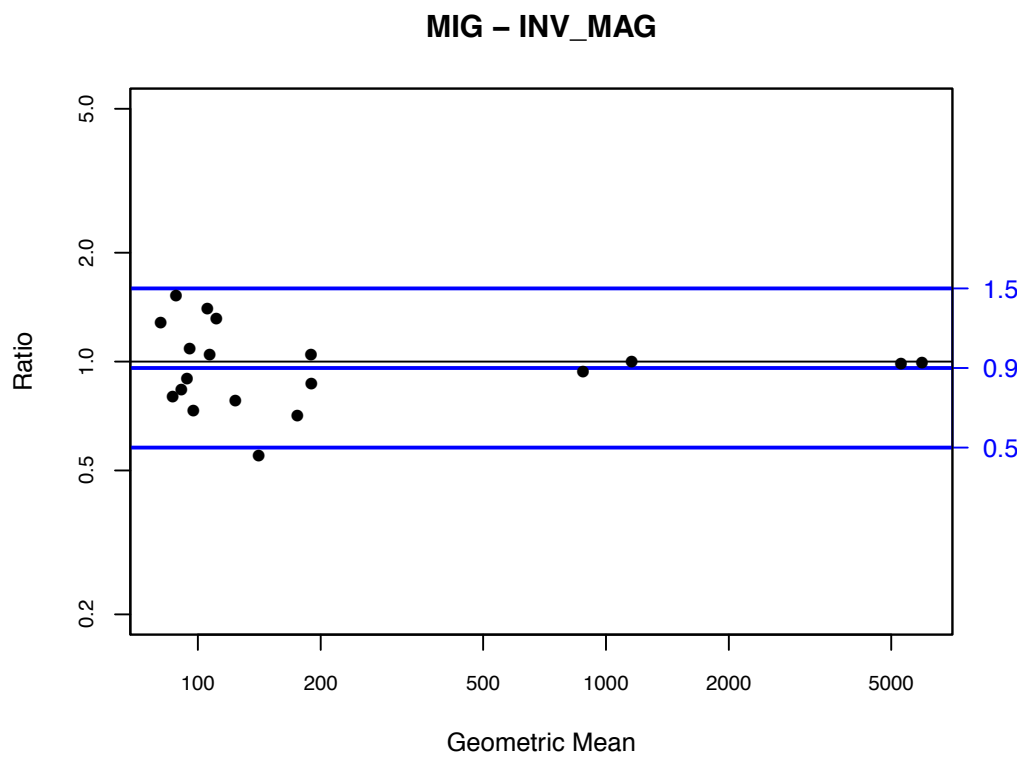

Supplement: S24 (10.1371/journal.pone.0052587.s024) [file journal.pone.0052587.s024]
