# Supplementary material for: Performance of Multiplex Commercial Kits to Quantify Cytokine and Chemokine Responses in Culture Supernatants from Plasmodium falciparum Stimulations
Source: PLOS journal article supplement (doi:10.1371/journal.pone.0052587), 2013-01-02

# Figure S25

## A

| parameter                              | value        |
|----------------------------------------|--------------|
| 1 Cytokine                             | MIP-1alpha   |
| 2 Vendor                               | Invitrogen   |
| 3 Samples included in this agreement   | 21           |
| 4 Proportion of both readings in range | 56.8         |
| 5 Limits of agreement                  | 0.46 to 2.65 |
| 6 Constant variance p.value            | 0.209        |
| 7 Constant ratio p.value               | 0.727        |
| 8 Ratio is 1 p.value                   | 0.338        |

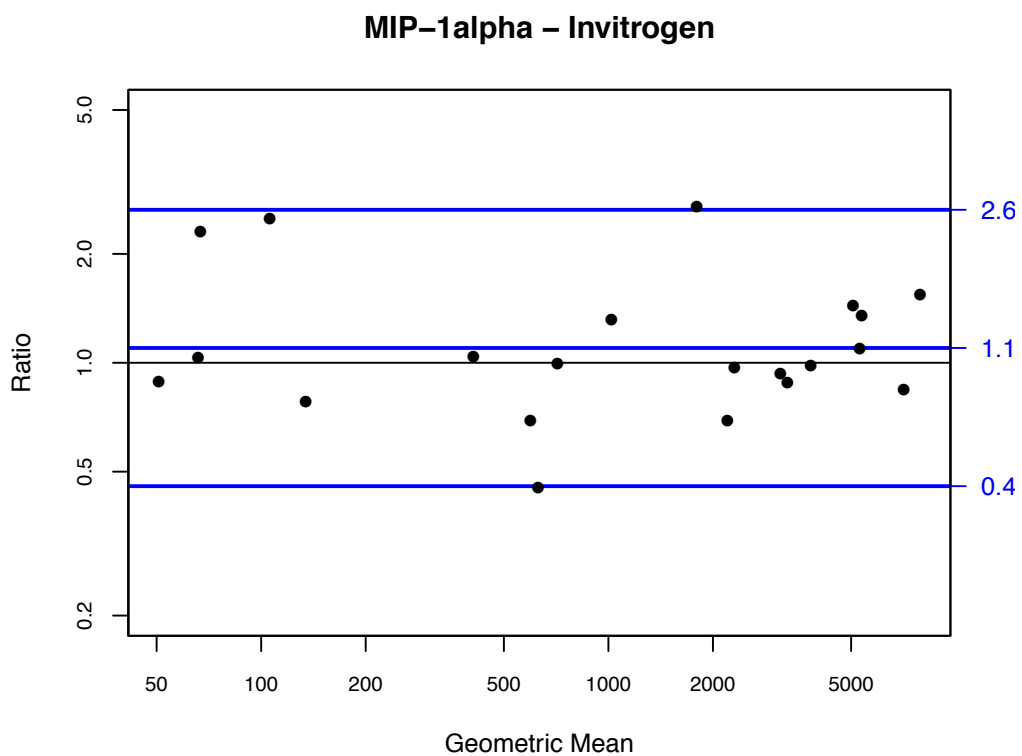

**B**

| parameter                              | value        |
|----------------------------------------|--------------|
| 1 Cytokine                             | MIP-1alpha   |
| 2 Vendor                               | INV_MAG      |
| 3 Samples included in this agreement   | 39           |
| 4 Proportion of both readings in range | 97.5         |
| 5 Limits of agreement                  | 0.80 to 1.22 |
| 6 Constant variance p.value            | 0.026        |
| 7 Constant ratio p.value               | 0.129        |
| 8 Ratio is 1 p.value                   | 0.471        |

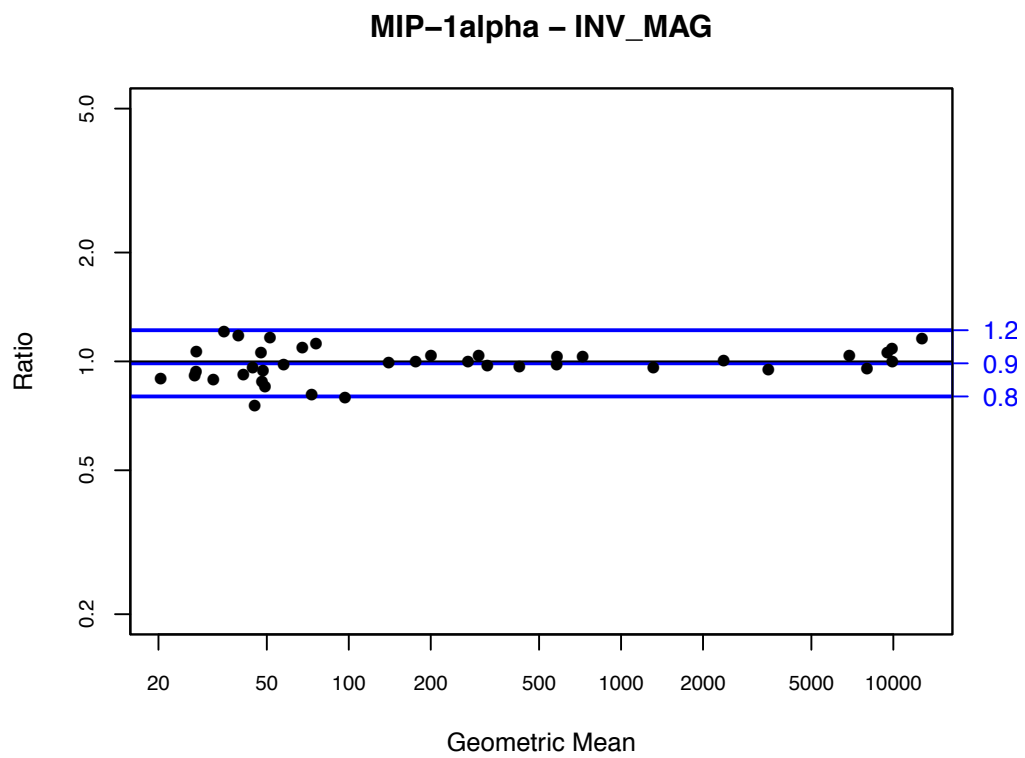

Supplement: S25 (10.1371/journal.pone.0052587.s025) [file journal.pone.0052587.s025]
