# Supplementary material for: Performance of Multiplex Commercial Kits to Quantify Cytokine and Chemokine Responses in Culture Supernatants from Plasmodium falciparum Stimulations
Source: PLOS journal article supplement (doi:10.1371/journal.pone.0052587), 2013-01-02

Figure S27

A

|   | parameter                            | value        |
|---|--------------------------------------|--------------|
| 1 | Cytokine                             | RANTES       |
| 2 | Vendor                               | Invitrogen   |
| 3 | Samples included in this agreement   | 33           |
| 4 | Proportion of both readings in range | 89.2         |
| 5 | Limits of agreement                  | 0.49 to 2.17 |
| 6 | Constant variance p.value            | 0.748        |
| 7 | Constant ratio p.value               | 0.406        |
| 8 | Ratio is 1 p.value                   | 0.627        |

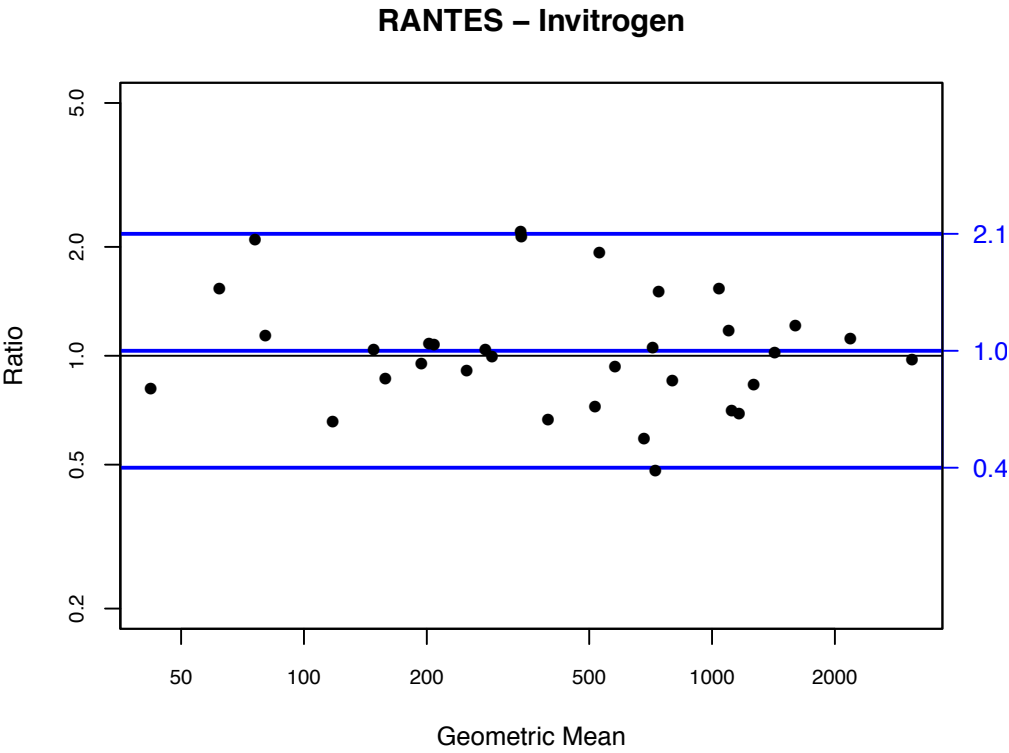

B

|   | parameter                            | value        |
|---|--------------------------------------|--------------|
| 1 | Cytokine                             | RANTES       |
| 2 | Vendor                               | INV_MAG      |
| 3 | Samples included in this agreement   | 40           |
| 4 | Proportion of both readings in range | 100.0        |
| 5 | Limits of agreement                  | 0.73 to 1.33 |
| 6 | Constant variance p.value            | 0.315        |
| 7 | Constant ratio p.value               | 0.249        |
| 8 | Ratio is 1 p.value                   | 0.552        |

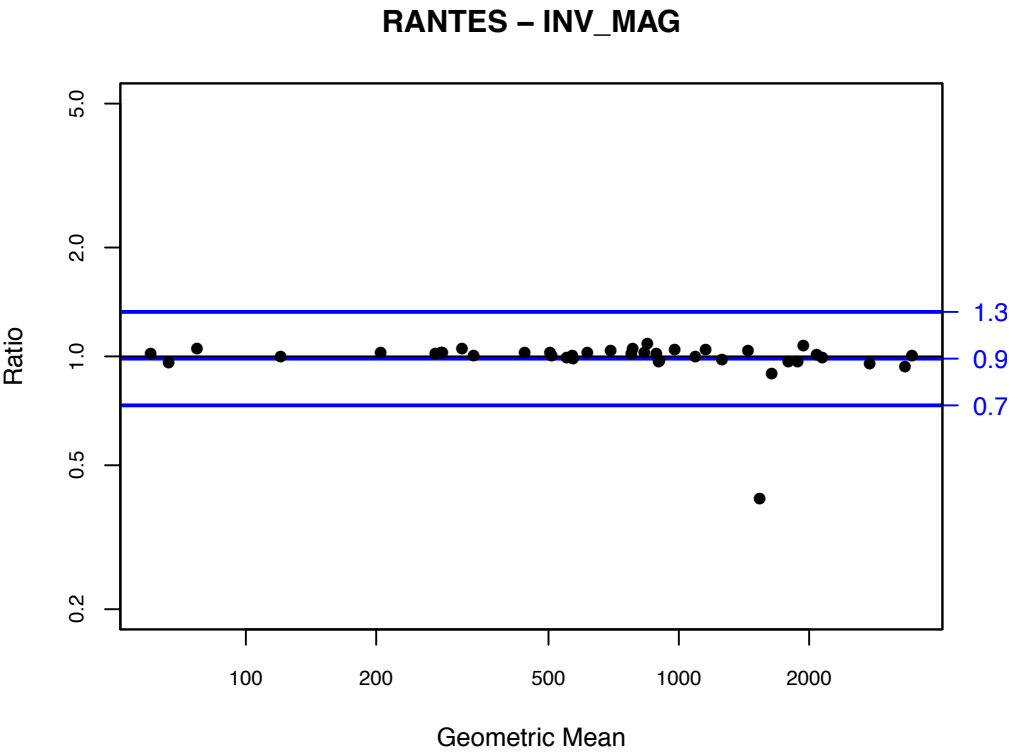

Supplement: S27 (10.1371/journal.pone.0052587.s027) [file journal.pone.0052587.s027]
